# Supplementary material for: Defective expression of ATG4D abrogates autophagy and promotes growth in human uterine fibroids
Source: PubMed Central journal article supplement (PMC5554887; doi:10.1038/cddiscovery.2017.41), 2017-08-14
Supplement: cddiscovery201741-s1.pdf [file cddiscovery201741-s1.pdf]

## Supplementary table 1: Primers sequence

| Primer Name | Sens 5' ----- 3'        | Anti-sens 3'----- 5'    |
|-------------|-------------------------|-------------------------|
| Actin       | CGTCATTGCACGAAGACACAA   | CCTGGTCCACCATTTTAAGGC   |
| ATG3        | ACATGGCAATGGGCTACAGG    | CTGTTTGCACCGCTTATAGCA   |
| ATG4        | CCAGCCCACTGTGGATGTC     | AAGCCACGGTACAGCTTG      |
| ATG4A       | TTCTTGGACCCTCATACAACCC  | TTAGGATGTTCAATTCGCTGTGG |
| ATG4B       | GGTGTGGACAGATGATCTTTGC  | CCAACTCCCATTTGCGCTATC   |
| ATG4C       | TAGAGGATCACGTAATTGCAGGA | GTTGTCAAAGCTGAGCCTTCTAT |
| ATG4D       | TATGGGCCATCGCTAGTGG     | CATACACGGGGTTGAGAGTCT   |
| ATG5        | AAAGATGTGCTTCGAGATGTGT  | CACTTTGTCAGTTACCAACGTCA |
| ATG7        | ATGATCCCTGTAAGTTAGCCCA  | CACGGAAGCAAACAAGTTCAAC  |
| ATG10       | AGACCATCAAAGGACTGTTCTGA | GGGTAGATGCTCCTAGATGTGAC |
| ATG12       | CTGCTGGCGACACCAAGAAA    | CGTGTTTCGCTCTACTGCCC    |
| ATG16       | TCTGGGACATTCGATCAGAGAG  | CCTTTCTGGGTTTAAGTCCAGG  |
| LAMP1       | TCTCAGTGAAGTACGACACCA   | AGTGTATGTCCTCTTCCAAAAGC |
| LAMP2       | TGGCAATGATACTTGTCTGCTG  | ACGGAGCCATTAACCAAATACAT |
